# Supplementary material for: Folic Acid Confers Tolerance against Salt Stress-Induced Oxidative Damages in Snap Beans through Regulation Growth, Metabolites, Antioxidant Machinery and Gene Expression
Source: MDPI journal article supplement (doi:10.3390/plants11111459), 2022-05-30
Supplement: s1 [file s1]

**Supplementary****Table S1.** Oligonucleotides primer pairs used for quantitative RT-PCR analysis.

| Gene Name                                            |   | Sequence                      |
|------------------------------------------------------|---|-------------------------------|
| <i>SOS1</i>                                          | F | 5'-ACTTGCAGGAGGAATACAAC-3'    |
|                                                      | R | 5'- CGAGAAGAGAAGACCACATC-3'   |
| <i>Osmotin-like protein</i><br>( <i>Osmotin-34</i> ) | F | 5'-GAACGGAGGGTGTCCACAAAATC-3' |
|                                                      | R | 5'-CGTAGTGGGTCCACAAGTTCCT-3'  |
| <i>NHX1</i>                                          | F | 5'-CGTGATGTCGCATTACACCT-3'    |
|                                                      | R | 5'- CTGGCAAACCTCCCACTTCTC-3'  |
| <i>GAPDH</i>                                         | F | 5'-TGACGACATCAAGAAGGTGGTG-3'  |
|                                                      | R | 5'-:GAAGGTGGAGGAGTGGGTGTC-3'  |
